# Supplementary material for: A highly reactive and magnetic recyclable catalytic system based on AuPt nanoalloys supported on ellipsoidal Fe@SiO2
Source: Royal Society of Chemistry journal article supplement (doi:10.1039/c4ta06085g), 2015-01-01
Supplement: c4ta06085g1.pdf [file c4ta06085g1.pdf]

## Supplementary Information for

### A Highly Reactive and Magnetic Recyclable Catalytic System Based on AuPt Nanoalloys Supported on Ellipsoidal Fe@SiO<sub>2</sub>

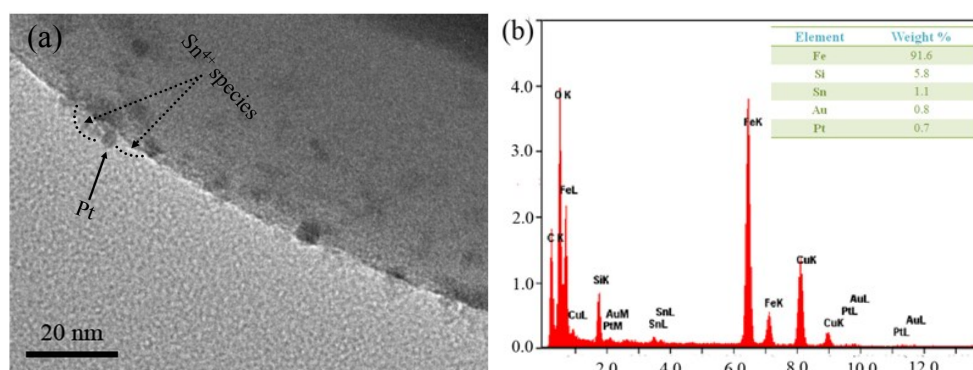

Figure S1 (a) Representative enlarged TEM image of Fe<sub>2</sub>O<sub>3</sub>@SiO<sub>2</sub>/Pt to show the “islands in the sea” configuration (one side of Pt NPs linking with SiO<sub>2</sub> layer is covered with a smooth layer and another side of Pt NPs is exposed). (b) EDX spectroscopy of the as-prepared Fe<sub>2</sub>O<sub>3</sub>@SiO<sub>2</sub>/AuPt NPs and the corresponding element composition.

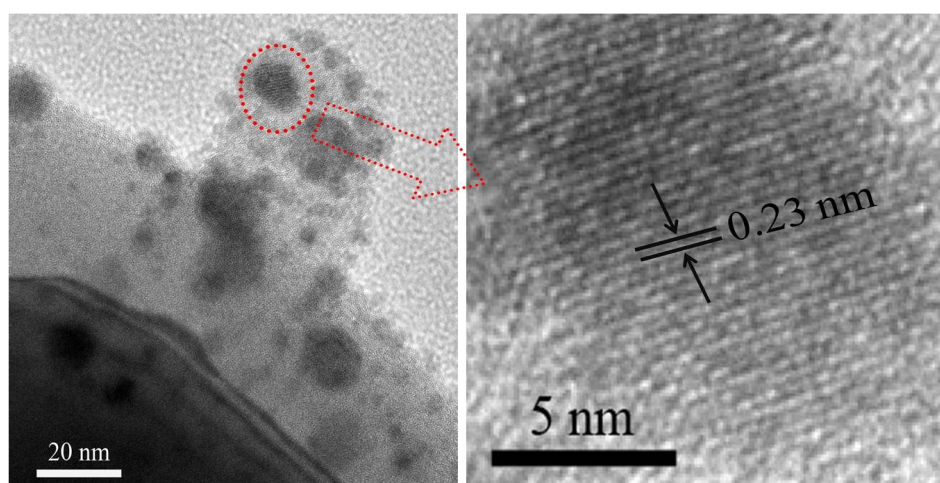

Figure S2 A representative HRTEM image of AuPt NPs on the surface of Fe@SiO<sub>2</sub> NCs.

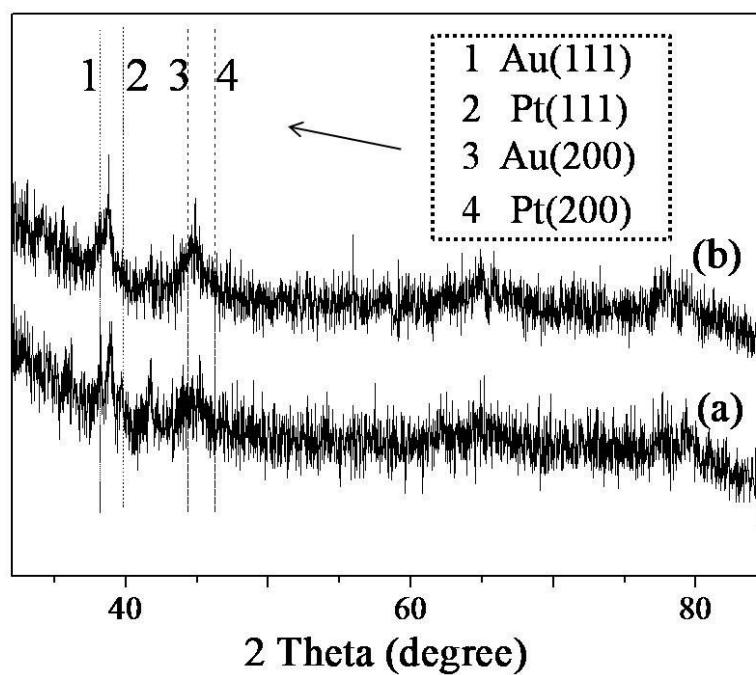

Figure S3 XRD patterns for the SiO<sub>2</sub>/AuPt with different ratio of AuPt dosage. (a) 0.5:1, and (b) 1:1(The corresponding TEM images were shown in Figure S8a). All the samples were sequentially suffered from roasting under air and then H<sub>2</sub> atmosphere.

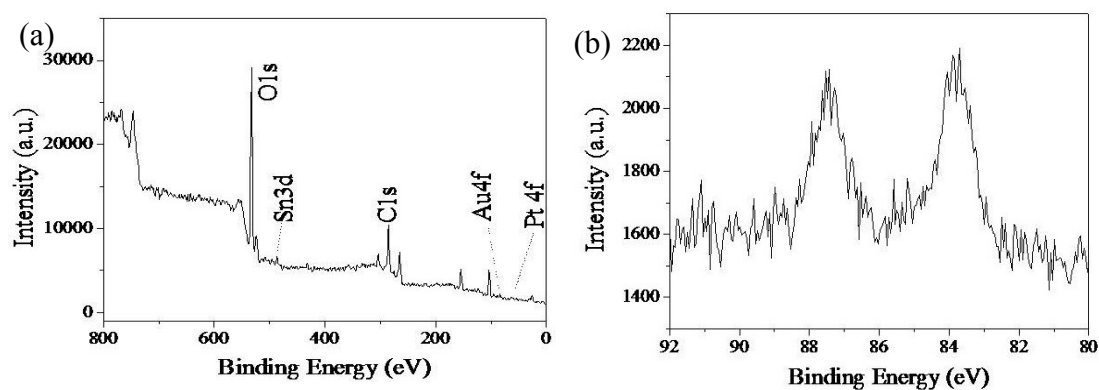

Figure S4 XPS spectra of the Fe@SiO<sub>2</sub>/AuPt nanocomposites: (a) fully scanned spectra, and (b) Au 4f spectra.

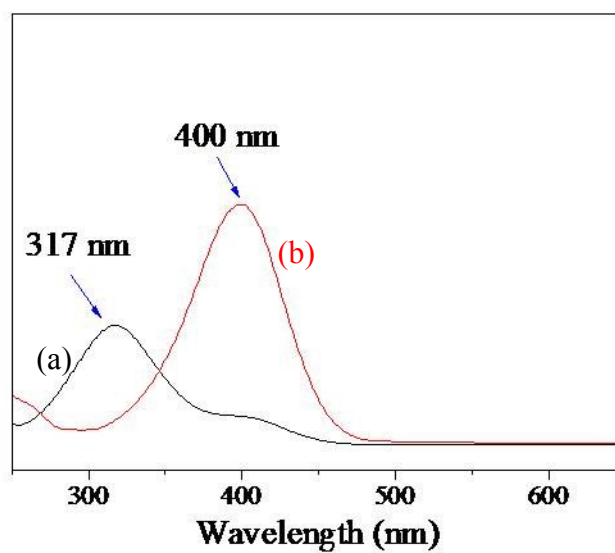

Figure S5 UV-vis absorption spectra of 4-NP (a) without and (b) with the addition of  $\text{NaBH}_4$  solution.

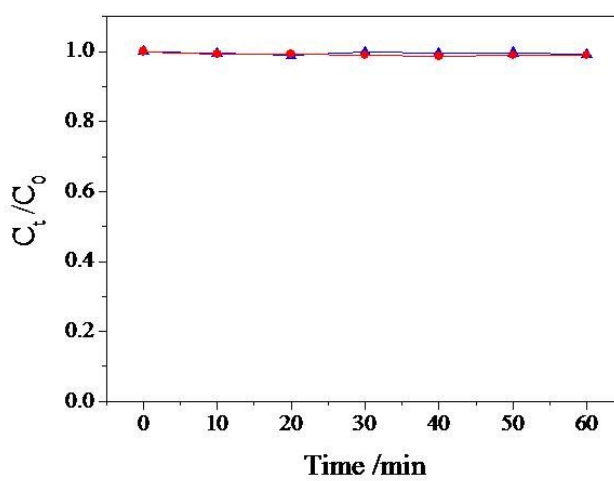

Figure S6  $C_t/C_0$  versus reaction time for the reduction of 4-NP with  $\text{Fe@SiO}_2$  NCs (blue line), and  $\text{Fe@SiO}_2\text{-Sn}$  NCs (red line).

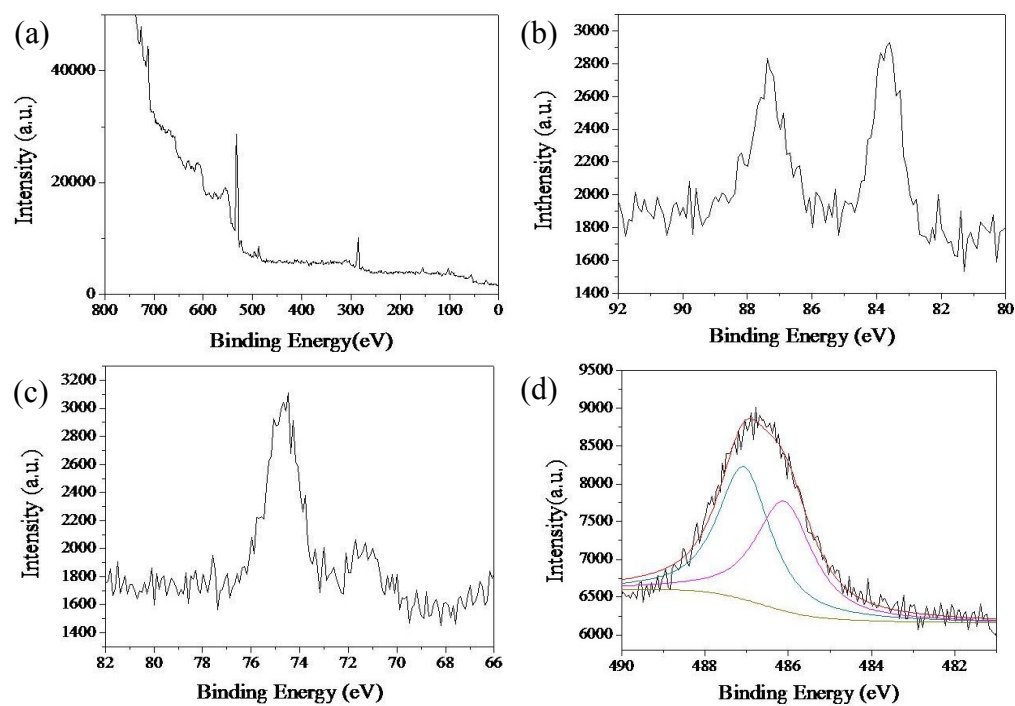

Figure S7 XPS spectra of the Fe/SiO<sub>2</sub>/AuPt composites after reduction reaction of 4-NP. (a) Fully scanned spectra, (b) Au 4f spectra, (c) Pt 4f spectra, and (d) Sn 3d spectra.

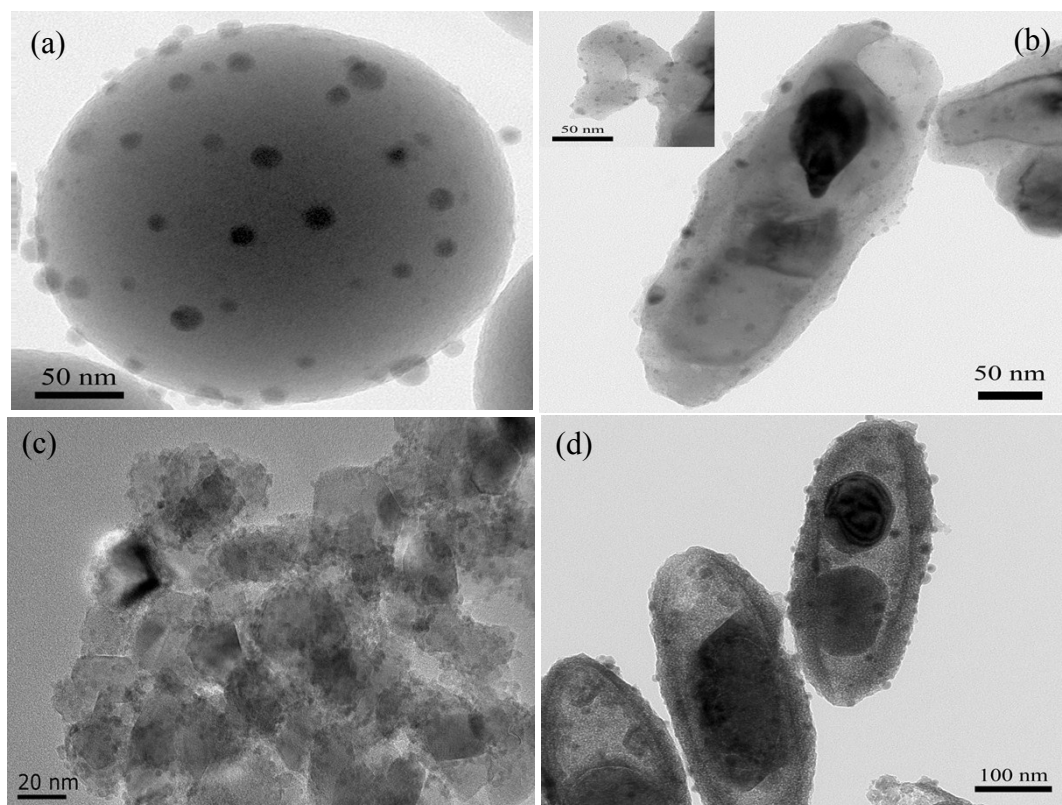

Figure S8 TEM images showing the versatile in-situ reduction methods to obtain AuPt bimetallic NPs on different oxides surface with more uniform distribution. (a) SiO<sub>2</sub>/AuPt(1:1), (b) Fe@TiO<sub>2</sub>/AuPt (Inset shows clearly the quite small size of AuPt NPs in the shell), (c) Degussa P25/AuPt, and (d) Fe@Ti<sub>0.5</sub>Zr<sub>0.5</sub>O<sub>2</sub>/AuPt. For the sample of (a) and (c), the nominal total weight of Au and Pt contents is increased to 1.0 %. And for the sample of (b) and (d), the addition of Au and Pt precursor is the same as the Fe@SiO<sub>2</sub>/AuPt. All the samples except (c) have been suffered from thermal treatments sequentially in air and H<sub>2</sub> atmosphere.

(For the preparation of Fe<sub>2</sub>O<sub>3</sub>@TiO<sub>2</sub> and Fe<sub>2</sub>O<sub>3</sub>@ZrO<sub>2</sub>-TiO<sub>2</sub>: 50 mL of the colloidal solution was added into a mixture solution containing ethanol (50 mL), 1-hexadecylamine (0.25 g), and ammonia (0.5 mL) with mechanical stirring. Then 0.4 mL of tetrabutyl titanate (for Fe<sub>2</sub>O<sub>3</sub>@TiO<sub>2</sub>) or a mixed solution containing 0.2 mL of tetrabutyl titanate and 0.2 mL of zirconium(IV) n-butoxide (for Fe<sub>2</sub>O<sub>3</sub>@ZrO<sub>2</sub>-TiO<sub>2</sub>) that dissolved in ethanol (25 mL) was slowly added to the colloidal mixture. After injection, the solution was kept to stir for 4 h, and then age for 12 h)

Table S1 Comparison of rate constant for the catalytic reduction of 4-NP by NaBH<sub>4</sub> using catalysts containing Au and (or) Pt nanoparticles.

| Catalyst                                                                             | Size of noble metal NPs (nm) | Initial concentration of 4-NP (mM) | Amount of noble NPs (nmol) | k <sub>app</sub> per noble NPs content (10 <sup>-2</sup> s <sup>-1</sup> μmol <sup>-1</sup> ) |
|--------------------------------------------------------------------------------------|------------------------------|------------------------------------|----------------------------|-----------------------------------------------------------------------------------------------|
| Au@SiO <sub>2</sub> <sup>1</sup>                                                     | 40                           | 0.1                                | 135.9                      | 1.40                                                                                          |
| Fe <sub>3</sub> O <sub>4</sub> @SiO <sub>2</sub> -Au@m-SiO <sub>2</sub> <sup>2</sup> | 12                           | 0.24                               | 335                        | 1.74                                                                                          |
| Au-CeO <sub>2</sub> <sup>3</sup>                                                     | 4                            | 0.068                              | 4.55                       | 281                                                                                           |
| PtCo/NaY <sup>4</sup>                                                                | 14                           | 7.2                                | 579.5                      | 1.722                                                                                         |
| Fe <sub>3</sub> O <sub>4</sub> /C/Pt-Pd <sup>5</sup>                                 | 10-20                        | 0.05                               | 1.68                       | 1202                                                                                          |
| Porous AuPt particles <sup>6</sup>                                                   | -                            | 0.24                               | ~2564                      | 2.145                                                                                         |
| Fe@SiO <sub>2</sub> /AuPt(This work)                                                 | 10                           | 0.37                               | 4.18                       | 662.0                                                                                         |

## References

1. Z. Wang, H. Fu, D. Han and F. Gu, *J Mater Chem A*, 2014, DOI: 10.1039/c4ta04524f.
2. Y. H. Deng, Y. Cai, Z. K. Sun, J. Liu, C. Liu, J. Wei, W. Li, C. Liu, Y. Wang and D. Y.

- Zhao, *J Am Chem Soc*, 2010, 132, 8466-8473.
3. C. M. Fan, L. F. Zhang, S. S. Wang, D. H. Wang, L. Q. Lu and A. W. Xu, *Nanoscale*, 2012, 4, 6835-6840.
  4. Z. M. El-Bahy, *Appl Catal a-Gen*, 2013, 468, 175-183.
  5. P. Zhang, R. Li, Y. M. Huang and Q. W. Chen, *Acs Appl Mater Inter*, 2014, 6, 2670-2677.
  6. A. J. Ma, J. Xu, X. H. Zhang, B. Zhang, D. Y. Wang and H. L. Xu, *Sci Rep-Uk*, 2014, 4.
